# Supplementary material
Source: PubMed Central journal article supplement (PMC3153587)
Supplement: NIHMS310705-supplement-1_si_001.pdf [file NIHMS310705-supplement-1_si_001.pdf]

## **Controlling Conformational Flexibility of an O<sub>2</sub>-Binding H-NOX Domain**

Emily E. Weinert, Christine M. Phillips-Piro, Rosalie Tran, Richard A. Mathies, Michael A. Marletta

### **Supporting Information**

**Figure S1.** Comparison of the heme pockets of *Tt* H-NOX (shown in teal; PDB ID 1U55 (1)) and sperm whale myoglobin (shown in purple; PDB ID 1A6M (2)). Key residues in the pocket are shown in orange sticks with nitrogens in blue and oxygens in red. Hydrogen bonding interactions between the protein and the bound oxygen molecule are shown in dashed black lines.

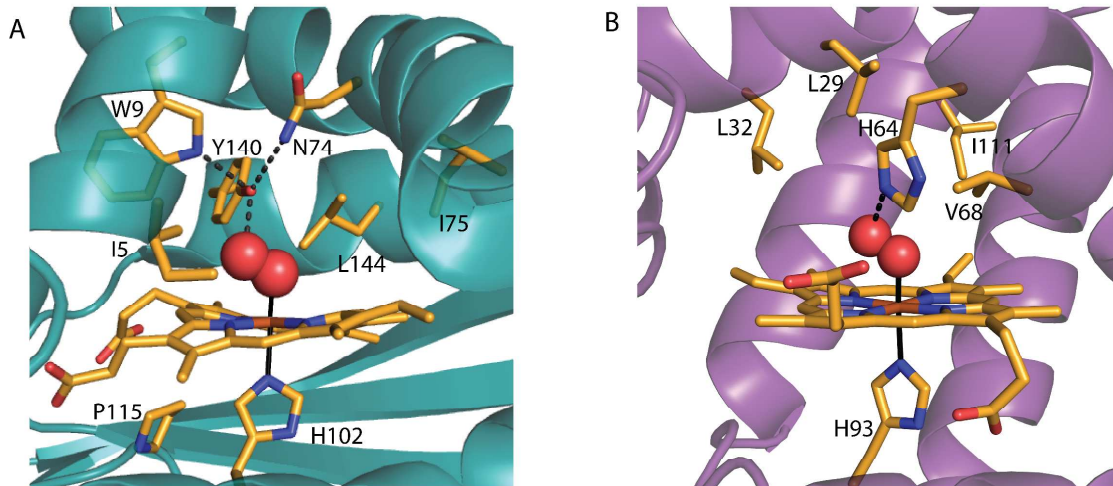

**Figure S2.** Resonance Raman spectra of WT, I5F, I75F, and L144F *Tt* H-NOX. The I5F mutant exhibits the most peak broadening and heme flexibility of all the mutants.

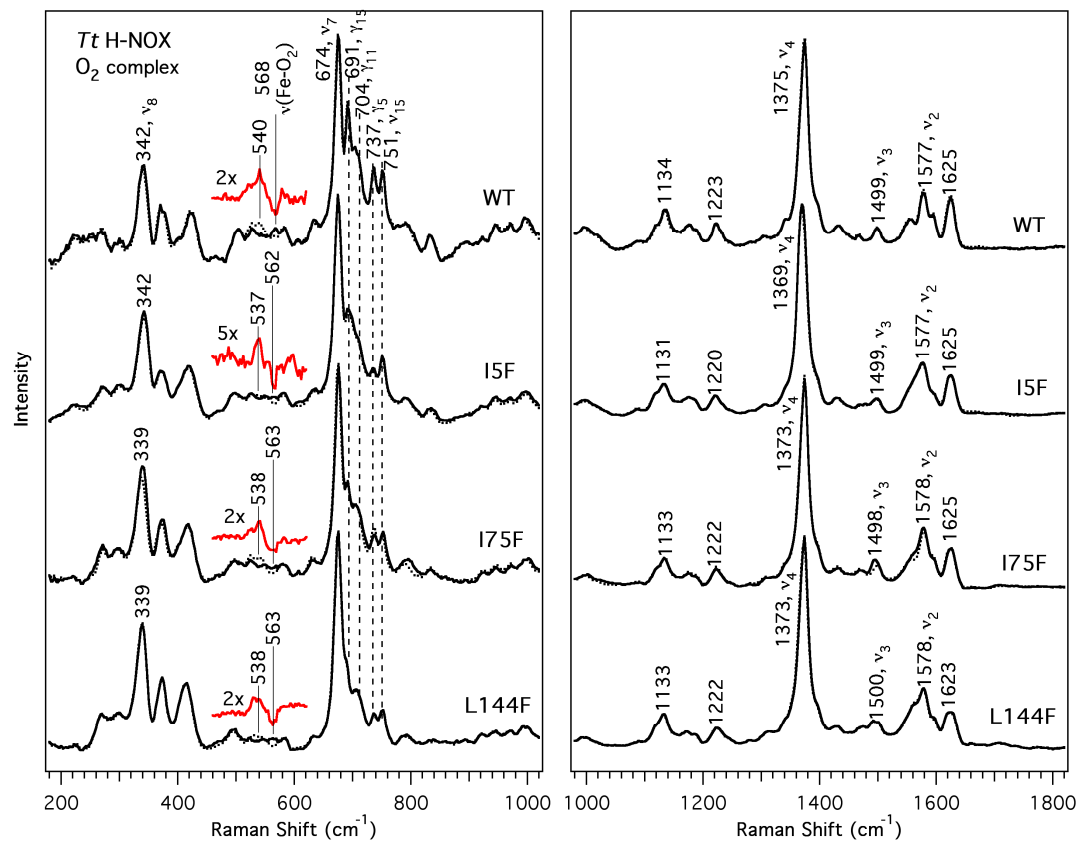

**Figure S3.** Composite omit map density of the disordered loop, residues 27-47, in the I5F *Tt* H-NOX structure. (A) To orient the loop with residues in the loop as well as H102 and the heme shown in stick. (B) Zoom-in of the loop region (boxed on right in (A)) with only the loop and heme shown for clarity. Electron density is contoured at  $1.0 \sigma$  and is shown for the heme cofactor for comparison.

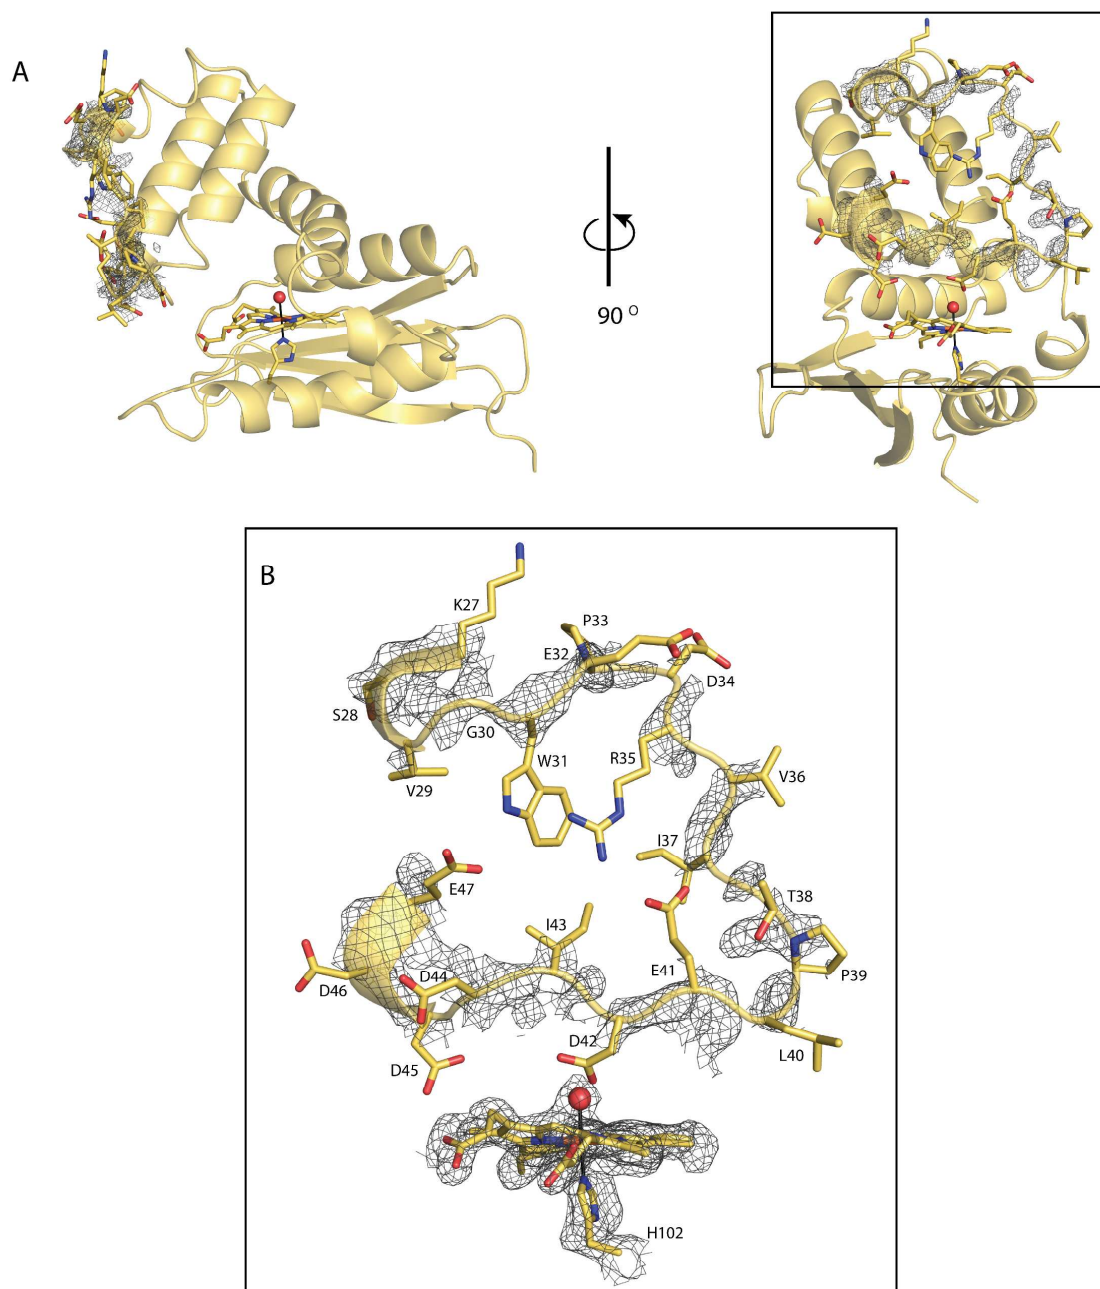

**Figure S4.** Residues F5 and F78 in the heme pocket are present in two distinct side chain conformations. A composite omit map contoured at  $1.0 \sigma$  is shown in grey mesh. The two conformations of the first N-terminal amino acids and F78 are shown in stick as well as the heme and H102. Density for the heme, water, and H102 are shown for comparison.

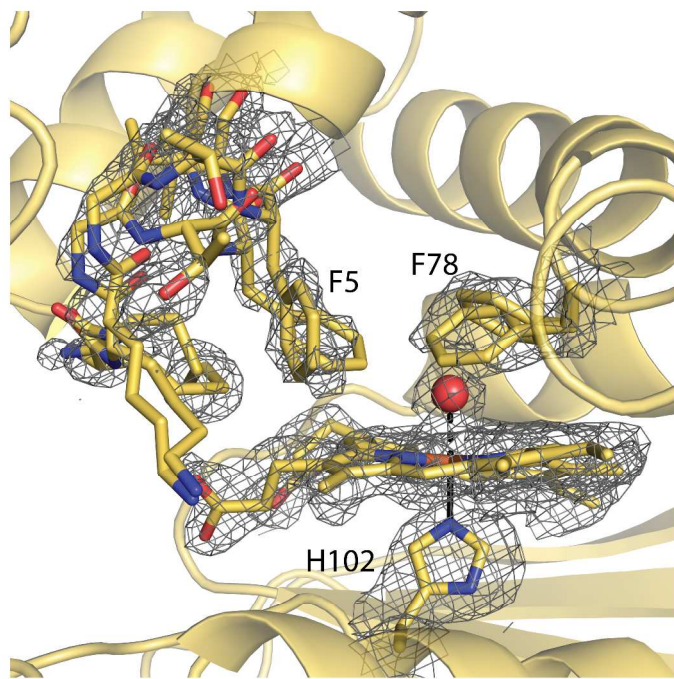

**Table S1:** Electronic absorption data.

| <b>Protein</b>             | <b>Soret</b> | <b><math>\beta</math></b> | <b><math>\alpha</math></b> | <b>Ref.</b> |
|----------------------------|--------------|---------------------------|----------------------------|-------------|
| <b>Unligated</b>           |              |                           |                            |             |
| WT                         | 431          |                           | 568                        | (3)         |
| I5F                        | 432          |                           | 563                        | this work   |
| I5F/I75F                   | 432          |                           | 563                        | this work   |
| I5F/L144F                  | 432          |                           | 555                        | this work   |
| I5F/I75F/L144F             | 432          |                           | 556                        | this work   |
| <b>O<sub>2</sub> bound</b> |              |                           |                            |             |
| WT                         | 416          | 556                       | 591                        | (3)         |
| I5F                        | 417          | 552                       | 590                        | this work   |
| I5F/I75F                   | 418          | 551                       | 585                        | this work   |
| I5F/L144F                  | 419          | 547                       | 580                        | this work   |
| I5F/I75F/L144F             | 421          | 546                       | 578                        | this work   |
| <b>CO bound</b>            |              |                           |                            |             |
| WT                         | 424          | 544                       | 565                        | (3)         |
| I5F                        | 425          | 546                       | 569                        | this work   |
| I5F/I75F                   | 425          | 548                       | 571                        | this work   |
| I5F/L144F                  | 424          | 544                       | 571                        | this work   |
| I5F/I75F/L144F             | 424          | 544                       | 572                        | this work   |
| <b>NO bound</b>            |              |                           |                            |             |
| WT                         | 420          | 547                       | 575                        | (3)         |
| I5F                        | 421, 399sh   | 551                       | 578                        | this work   |
| I5F/I75F                   | 403, 417     | 552                       | 578                        | this work   |
| I5F/L144F                  | 422, 403     | 551                       | 578                        | this work   |
| I5F/I75F/L144F             | 422, 404     | 552                       | 578                        | this work   |

**Table S2.** NO dissociation rates.<sup>a</sup>

| <b>Tt H-NOX</b> | <b>k<sub>off,fast</sub> NO<br/>(x10<sup>-4</sup> s<sup>-1</sup>)</b> | <b>k<sub>off,slow</sub> NO<br/>(x10<sup>-4</sup> s<sup>-1</sup>)</b> | <b>Fe-NO<br/>Coord</b> | <b>Ref.</b>    |
|-----------------|----------------------------------------------------------------------|----------------------------------------------------------------------|------------------------|----------------|
| WT              | 6.29 ± 0.48                                                          | 1.31 ± 0.22                                                          | 6                      | (3)            |
| I75F            | 15.68 ± 2.87                                                         | 4.15 ± 0.78                                                          | 5/6                    | (4), this work |
| L144F           | 1.85 ± 0.85                                                          | 1.08 ± 0.33                                                          | 5/6                    | (4), this work |
| I75F/L144F      | 4.52 ± 0.87                                                          | 1.28 ± 0.04                                                          | 5/6                    | (4), this work |
| I5L             | 8.93 ± 0.82                                                          | 3.99 ± 0.58                                                          | 6                      | this work      |
| I5F             | <sup>b</sup>                                                         | 1.10 ± 0.16                                                          | 6                      | this work      |
| I5F/I75F        | 1.39 ± 0.37                                                          | 0.465 ± 0.0503                                                       | 5/6                    | this work      |
| I5F/L144F       | 1.75 ± 0.017                                                         | 0.398 ± 0.081                                                        | 5/6                    | this work      |
| I5F/I75F/L144F  | 1.94 ± 0.11                                                          | 0.517 ± 0.037                                                        | 5/6                    | this work      |

<sup>a</sup> NO dissociation rate measurement. NO dissociation rates were performed as previously described (4, 5). Briefly, Fe<sup>II</sup>-NO complexes were rapidly mixed with equivolume of buffer B containing saturated CO and 30 mM dithionite (final concentration) as an NO trap. Data were acquired on either a Cary 3E spectrophotometer equipped with a Neslab RTE-100 constant temperature bath or a Cary 300Bio with Peltier accessory with the temperature bath set to 20 °C. The NO dissociation rate was determined from the increase in the maximum of the Fe(II)-CO spectra over time.

<sup>b</sup> The biexponential NO dissociation rates for the mutants that are a mixture of 5/6 coordinate Fe<sup>II</sup>-NO are likely due to the required conversion from 5 to 6 coordinate to allow NO dissociation. In addition, the biexponential behavior may also be due to interconversion of multiple protein conformations in solution (6). *Tt* WT and I5L proteins exhibit biexponential behavior despite the Fe<sup>II</sup>-NO adduct being solely 6 coordinate. This is likely due to multiple protein conformations in solution that alter the rates of NO dissociation. In contrast, the NO dissociation rate for the I5F mutant is monoexponential. This is likely due to the increased flexibility leading to rapid interconversion of the various solution conformations of the protein.

**Table S3:** Resonance Raman skeletal markers.

| <b>Protein</b> | <b>Ligand</b>  | <b><math>\nu_{10}</math></b> | <b><math>\nu_2</math></b> | <b><math>\nu_3</math></b> | <b><math>\nu_4</math></b> | <b><math>\nu(\text{Fe-O}_2)</math></b> | <b>Ref.</b> |
|----------------|----------------|------------------------------|---------------------------|---------------------------|---------------------------|----------------------------------------|-------------|
| <i>Tt</i> WT   | O <sub>2</sub> | 1624                         | 1579                      | 1499                      | 1375                      | 567                                    | (3, 7)      |
| <i>Tt</i> I5L  | O <sub>2</sub> | 1627                         | 1580                      | 1499                      | 1372                      | 564                                    | (7)         |
| <i>Tt</i> I5F  | O <sub>2</sub> | 1625                         | 1577                      | 1499                      | 1369                      | 562                                    | this work   |

1. Pellicena, P., Karow, D. S., Boon, E. M., Marletta, M. A., and Kuriyan, J. (2004) Crystal structure of an oxygen-binding heme domain related to soluble guanylate cyclases, *Proc Natl Acad Sci USA* *101*, 12854-12859.
2. Vojtechovsky, J., Chu, K., Berendzen, J., Sweet, R. M., and Schlichting, I. (1999) Crystal structures of myoglobin-ligand complexes at near-atomic resolution, *Biophys J* *77*, 2153-2174.
3. Karow, D. S., Pan, D., Tran, R., Pellicena, P., Presley, A., Mathies, R. A., and Marletta, M. A. (2004) Spectroscopic characterization of the soluble guanylate cyclase-like heme domains from *Vibrio cholerae* and *Thermoanaerobacter tengcongensis*, *Biochemistry* *43*, 10203-10211.
4. Weinert, E. E., Plate, L., Whited, C. A., Olea, C., Jr., and Marletta, M. A. (2010) Determinants of ligand affinity and heme reactivity in H-NOX domains, *Angew Chem Int Ed Engl* *49*, 720-723.
5. Boon, E. M., Huang, S. H., and Marletta, M. A. (2005) A molecular basis for NO selectivity in soluble guanylate cyclase, *Nature Chem Biol* *1*, 53-59.
6. Boon, E. M., Davis, J. H., Tran, R., Karow, D. S., Huang, S. H., Pan, D., Miazgowicz, M. M., Mathies, R. A., and Marletta, M. A. (2006) Nitric oxide binding to prokaryotic homologs of the soluble guanylate cyclase beta1 H-NOX domain, *J Biol Chem* *281*, 21892-21902.
7. Tran, R., Boon, E. M., Marletta, M. A., and Mathies, R. A. (2009) Resonance Raman spectra of an O<sub>2</sub>-binding H-NOX domain reveal heme relaxation upon mutation, *Biochemistry* *48*, 8568-8577.
